# Supplementary material for: Thermoelectric Characteristics of A Single-Crystalline Topological Insulator Bi2Se3 Nanowire
Source: PubMed Central journal article supplement (PMC8005119; doi:10.3390/nano11030819), 2021-03-23
Supplement: nanomaterials-11-00819-s001.pdf [file nanomaterials-11-00819-s001.pdf]

## Supplementary Materials

# Thermoelectric Characteristics of A Single-Crystalline Topological Insulator $\text{Bi}_2\text{Se}_3$ Nanowire

Dedi <sup>1,3,\*</sup>, Ping-Chung Lee <sup>3</sup>, Pai-Chun Wei <sup>2</sup> and Yang-Yuan Chen <sup>3</sup>

<sup>1</sup> Research Center for Electronics and Telecommunications (P2ET), Indonesian Institute of Sciences (LIPI), Bandung 40135, Indonesia

<sup>2</sup> Center for Condensed Matter Sciences and Center of Atomic Initiatives for New Materials, National Taiwan University, Taipei 10617 Taiwan; pcwei68@gmail.com

<sup>3</sup> Institute of Physics, Academia Sinica, Taipei 11529, Taiwan; plexlee@gmail.com (P.-C.L.); chenyy2@phys.sinica.edu.tw (Y.-Y.C.).

\* Correspondence: dedi030@lipi.go.id; Tel.: +62-22-250-4660

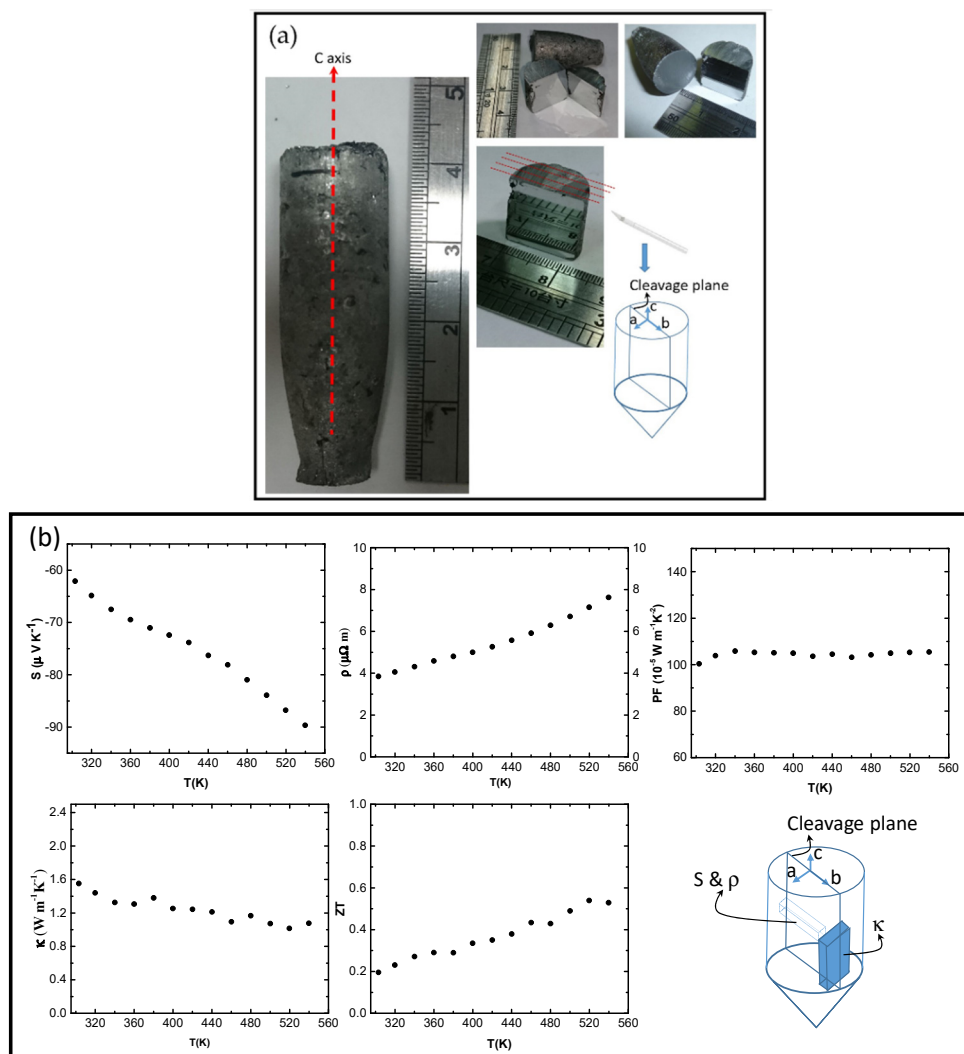

**Figure S1.** (a) Image of  $\text{Bi}_2\text{Se}_3$  single crystalline was growth by Bridgman method and (b) Temperature dependent of thermoelectric properties of single crystalline  $\text{Bi}_2\text{Se}_3$  bulk, which are  $-62.10 \mu\text{V K}^{-1}$ ,  $259998 \text{ S m}^{-1}$ ,  $1.55 \text{ W m}^{-1}\text{K}^{-1}$ , and  $0.19$  for Seebeck coefficient ( $S$ ), electrical conductivity ( $\sigma$ ), thermal conductivity ( $\kappa$ ) and figure of merit  $ZT$ , respectively at room temperature as shown in table 1.

**Table S1.** The fitting parameters of the third harmonic voltage signal  $V_{3\omega}$  as a function of the extraction current amplitude  $I_0$  for figure 5a.

| Equation      |         | $y = (K \cdot x^3)$      |                          |
|---------------|---------|--------------------------|--------------------------|
| Adj. R-Square | 0.92439 |                          |                          |
|               |         | Value                    | Standard Error           |
| $V_{3\omega}$ | K       | $5.35152 \times 10^{-5}$ | $3.21872 \times 10^{-8}$ |

**Table S2.** The fitting parameters of frequency dependence of  $V_{3\omega}$  for figure 5b.

| Equation      |         | $y = K \cdot \left( \frac{1}{\sqrt{1 + G \cdot x^2}} + 0.01 \right)$ |                          |
|---------------|---------|----------------------------------------------------------------------|--------------------------|
| Adj. R-Square | 0.92439 |                                                                      |                          |
|               |         | Value                                                                | Standard Error           |
| $V_{3\omega}$ | K       | $2.74832 \times 10^{-5}$                                             | $1.14172 \times 10^{-8}$ |
| $V_{3\omega}$ | G       | $5.96359 \times 10^{-6}$                                             | $3.18552 \times 10^{-7}$ |

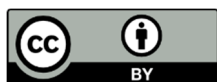

**Copyright:** © 2021 by the authors. Licensee MDPI, Basel, Switzerland. This article is an open access article distributed under the terms and conditions of the Creative Commons Attribution (CC BY) license (<http://creativecommons.org/licenses/by/4.0/>).
